# Supplementary material for: Cranial Neural Crest Specific Deletion of TNAP Causes Abnormal Chondrocyte Maturation and Deficient Cranial Base Growth
Source: Preprints.org preprint supplement (doi:10.20944/preprints202308.1993.v1), 2023-08-30

**Supplemental Figure 1. Landmarks used for whole skull and cranial base linear distance measurements. (A)** Craniofacial skeletal landmarks: 1 = nasale, 2 = nasion, 3 = bregma, 4 = pari, 5,6 = joining of squamosal body to zygomatic process of squamous portion of temporal bone, 7 = paro, 8,9 = intersection of frontal process of maxilla with frontal and lacrimal bones (inner canthal distance), 10 = inferior portion of the sphenoccipital synchondrosis. **(B)** Illustration of the cranial base: PS presphenoid bone; BS = basisphenoid bone; BO = basioccipital bone; SOS = sphenoccipital synchondrosis; ISS = intersphenoid synchondrosis.

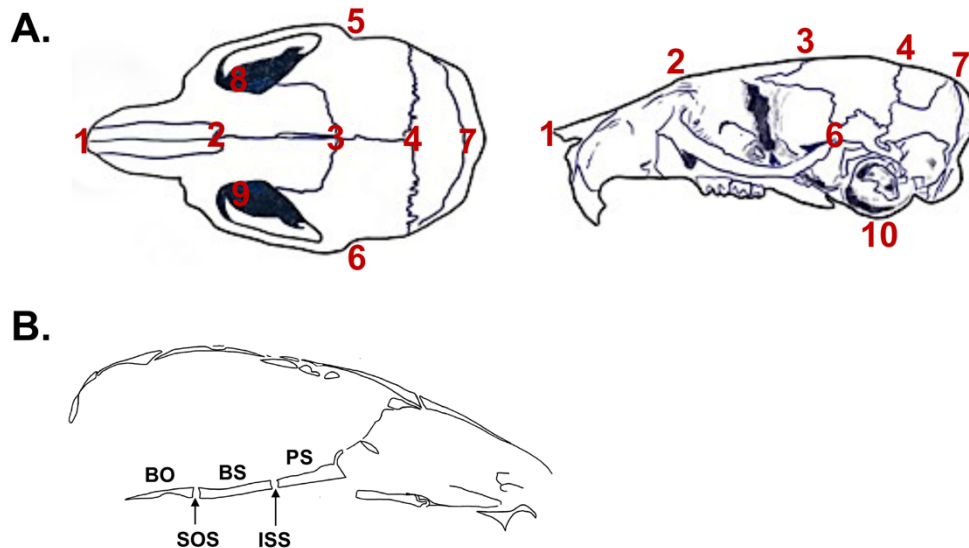

**Supplemental Figure 2. Col II expression is not altered in the ISS of  $Alpl^{fl/fl};P0-Cre^+$  mice.** Quantification of immunofluorescent staining for collagen 2 revealed no differences in any chondrocyte zones of  $Alpl^{fl/fl};P0-Cre^+$  as compared to  $Alpl^{fl/fl}$  mice.

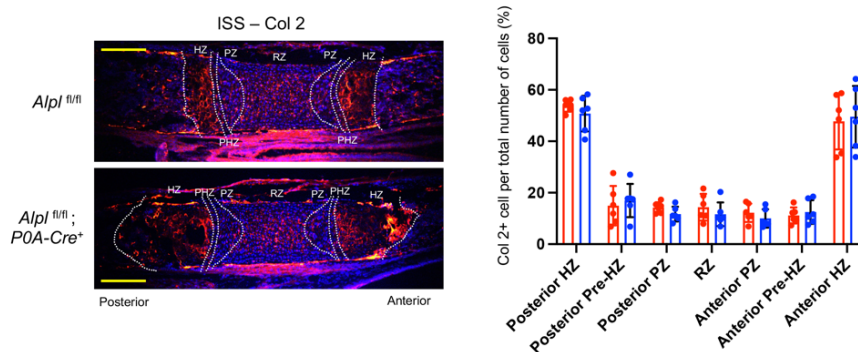

**Supplemental Figure 3. No differences in ISS between neonatal  $Alpl^{fl/fl};P0-Cre^+$  and control mice.** Quantification of chondrocyte zones by H&E staining revealed no qualitative or quantitative differences between  $Alpl^{fl/fl};P0-Cre^+$  as compared to  $Alpl^{fl/fl}$  mice.

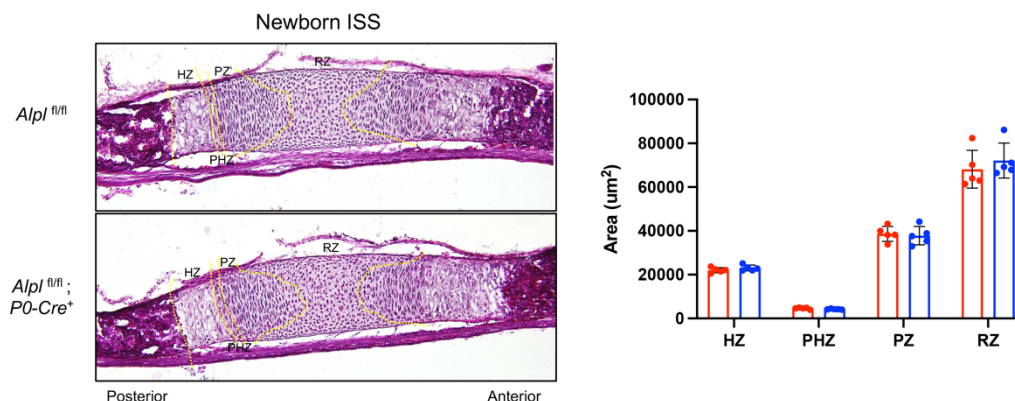

Supplement: Supplementary file 1 [file supplementary]
